# Supplementary material for: Quantifying the added value of high resolution climatemodels: A systematic comparison of WRF simulations for complex Himalayan terrain
Source: Copernicus journal article supplement (doi:10.5194/esd-2017-31), 2017-04-05
Supplement: Supplementary file 1 [file esd-2017-31-supplement.pdf]

Supplement:

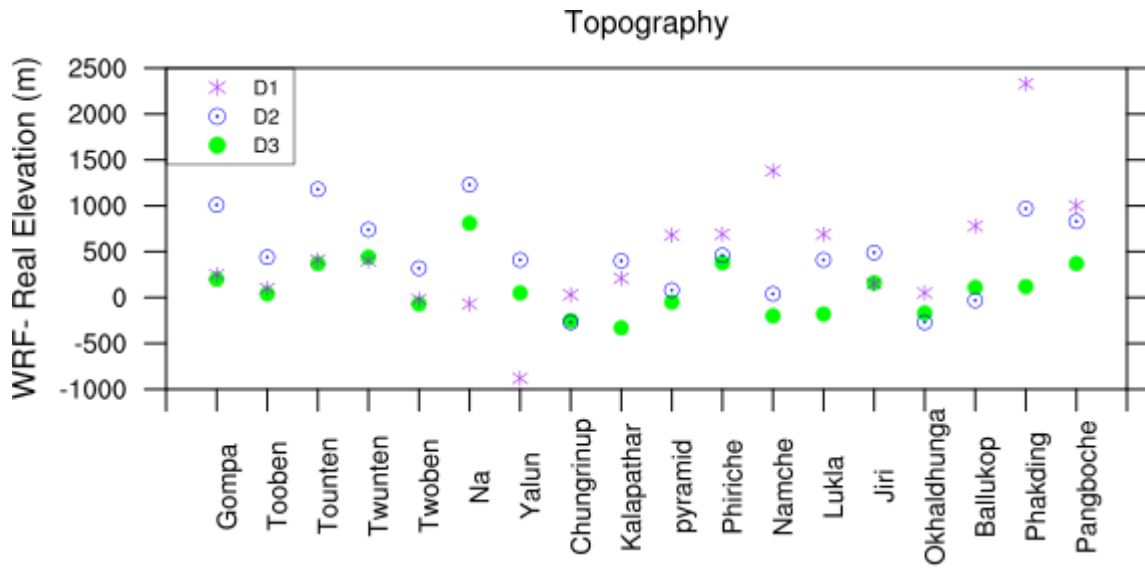

Figure S1: Difference between WRF simulated and real elevation for three WRF resolutions in air temperature station locations.

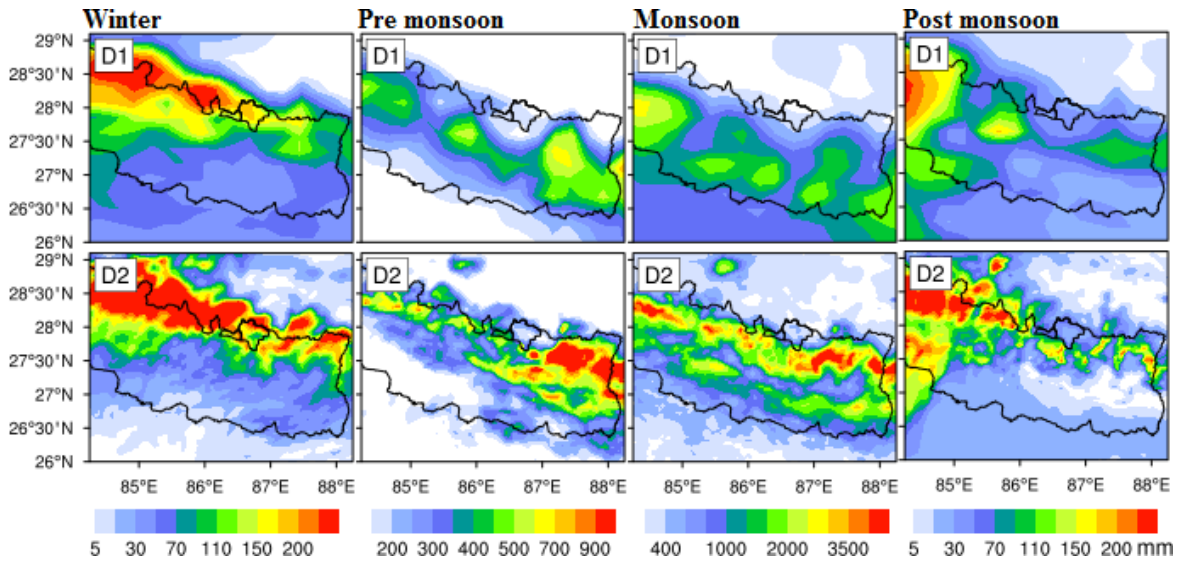

Figure S2: Seasonal distribution of precipitation in larger area in D2 and D1 domain resolutions.
